# Supplementary figures and images for: In vivo CRISPR screening identifies Ptpn2 as a cancer immunotherapy target
Source: Springer Nature journal article supplement (doi:10.1038/nature23270), 2017-07-01

Supplementary Figure 1 - Source western blot images

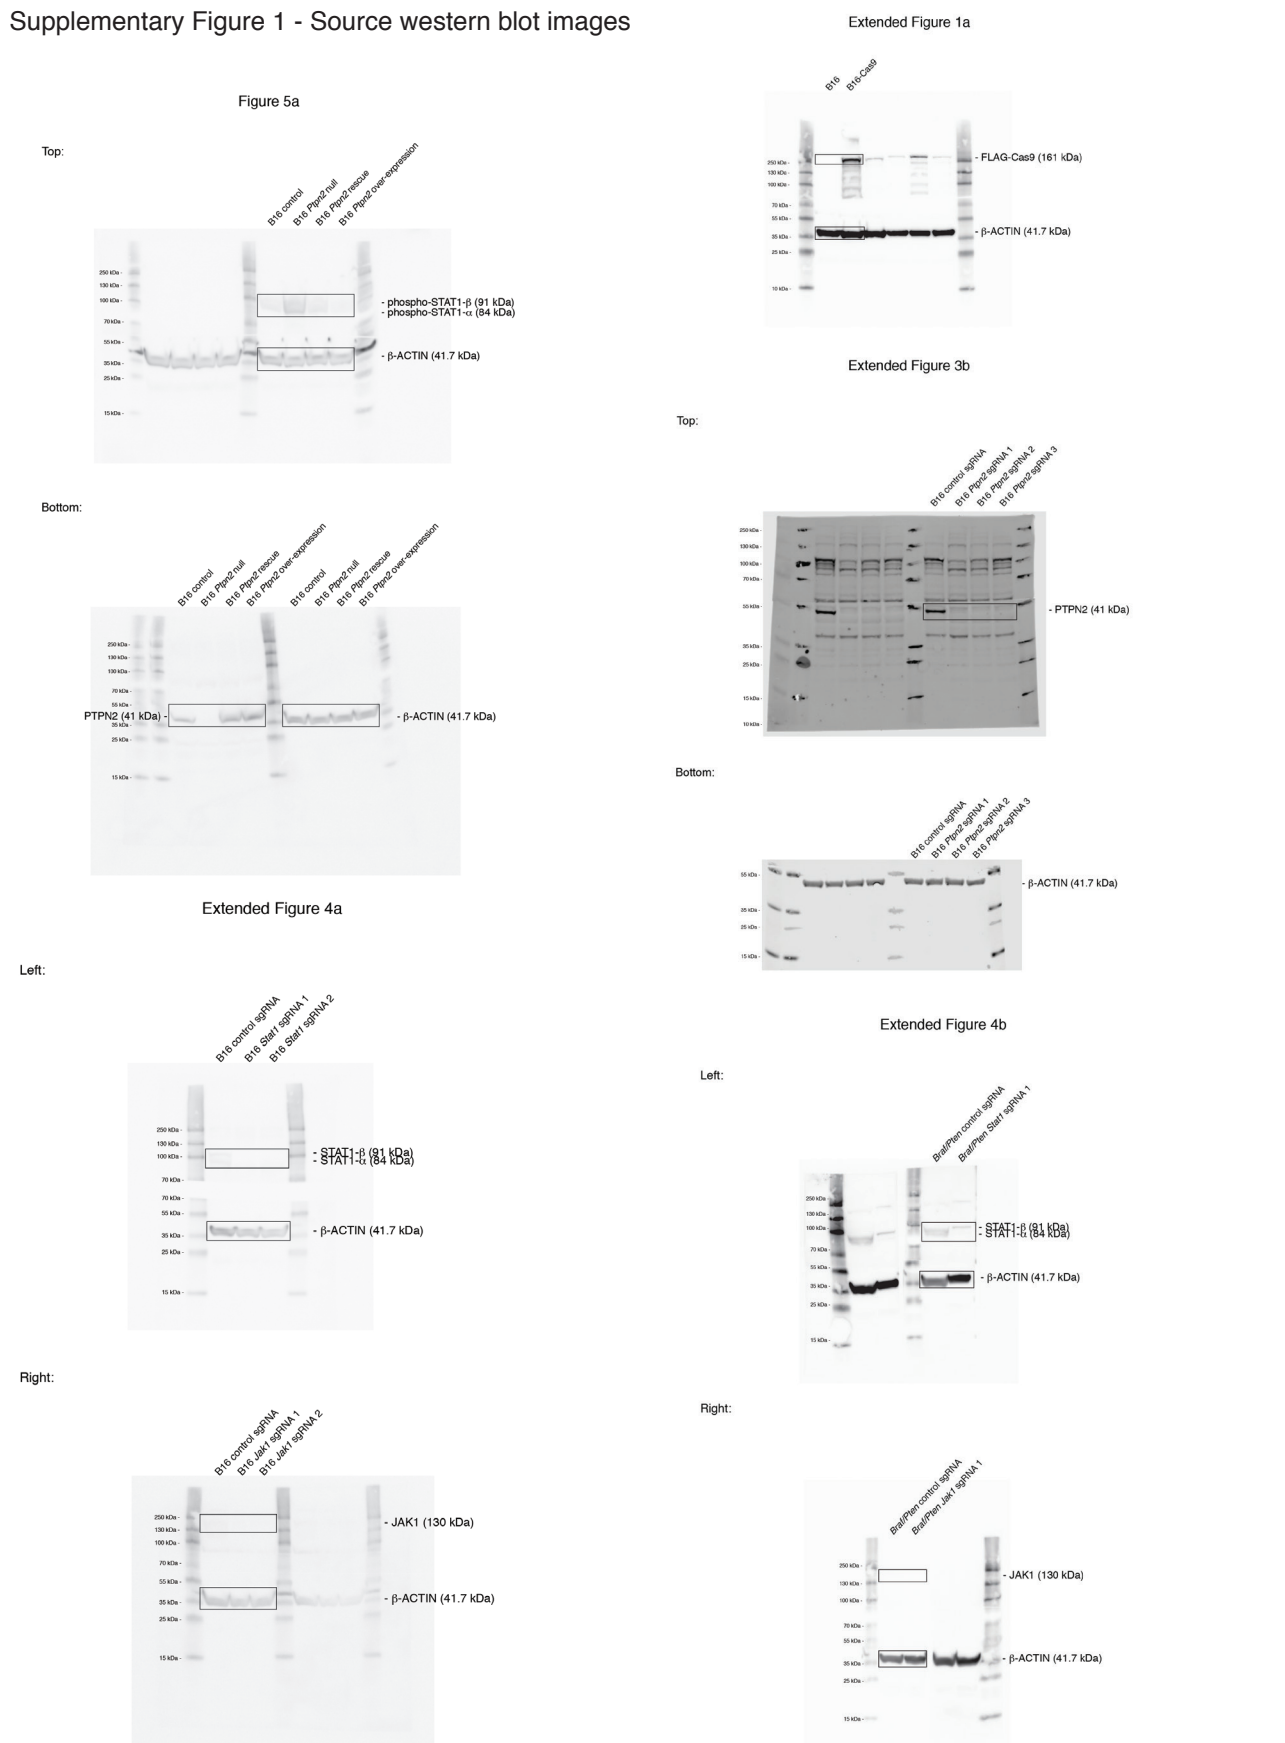

Supplement: 41586_2017_BFnature23270_MOESM1_ESM.pdf [file 41586_2017_BFnature23270_MOESM1_ESM.pdf]
